# Supplementary material for: The effect of uncertainty in patient classification on diagnostic performance estimations
Source: PubMed Central journal article supplement (PMC6530857; doi:10.1371/journal.pone.0217146), 2019-05-22
Supplement: pone.0217146.s003.pdf [file pone.0217146.s003.pdf]

### **S3 Supporting Information: Weighting for introduced misclassification events**

Using the dataset of Miller et al. [1] and the method described in S2 supporting information, each patient received a probabilistic assessment of his or her systemic infection status. Suppose a patient was assessed with an 87.5% probability of systemic infection. If the trial were run again, assuming all of the expert panelists were equally competent, then for any given clinician providing a diagnosis, this particular patient would be expected to have a 87.5% chance of being diagnosed as 'systemic infection present', and a 12.5% chance of being diagnosed as 'systemic infection absent'.

To reflect a given misclassification rate, for example a 10% false negative (FN) rate, 10% of the known positive samples must be selected and re-labeled as negative. Selection of specific samples to re-label is based on the observed uncertainty distribution. For example, patients with a 75% confident diagnosis of systemic infection have a residual diagnostic uncertainty of 25%, while patients with a 50% confident diagnosis of systemic infection have a residual diagnostic uncertainty of 50%. When randomly selecting patients for misclassification as false positives according to the algorithm and online application described in this paper, those having a residual diagnostic uncertainty of 50% have 2x the likelihood of being selected, compared to those having a residual diagnostic uncertainty of 25%. This weighting scheme reflects the expectation that patients with more certainty in classification are less likely to be misclassified.

## References

1. Miller III RR, Lopansri BK, Burke JP, Levy M, Opal S, Rothman RE, et al. Validation of a Host Response Assay, Septicyte™ LAB, for Discriminating Sepsis from SIRS in the ICU. *Am J Resp Crit Care Med.* 2018;198:903-913. doi: 10.1164/rccm.201712-2472OC.
