# Supplementary material for: The effect of uncertainty in patient classification on diagnostic performance estimations
Source: PubMed Central journal article supplement (PMC6530857; doi:10.1371/journal.pone.0217146), 2019-05-22
Supplement: pone.0217146.s007.pdf [file pone.0217146.s007.pdf]

## **S7 Supporting information: Very high performance tests**

The following analysis shows that the goal of achieving a very high diagnostic test performance, such as a 99% sensitivity, can be rendered nearly unreachable, if the comparator diagnosis contains even small amounts of uncertainty.

**Step 1:** Consider a diagnostic test which perfectly discriminates negative and positive subjects, under the assumption that the comparator is noise-free.

Generate simulation data:

1000 negative subjects (mean score 0.20, standard deviation 0.10)

1000 positive subjects (mean score 1.30, standard deviation 0.20)

Use a binary cut-off threshold of 0.6.

This scenario is shown below in Fig S7.1.

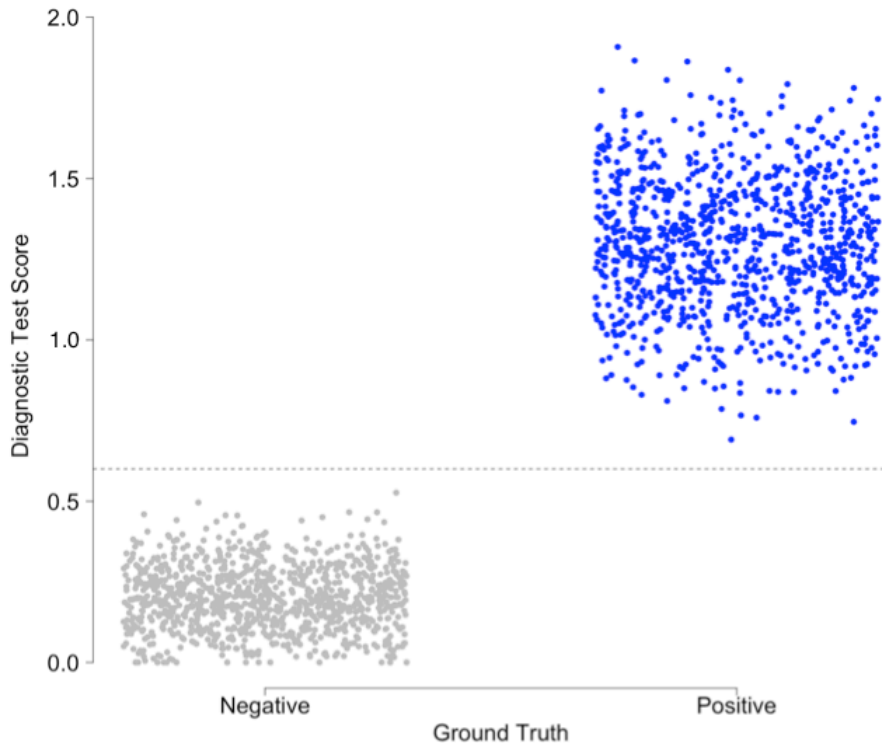

**Fig S7.1** Behavior of diagnostic test having perfect separation of negative and positive subjects, with no comparator error. Negative subjects: mean 0.20, SD 0.10. Positive subjects: mean 1.30, SD 0.20.

**Step 2:** Into the above distribution, randomly introduce a 2.5% false positive rate (FPR) and a 2.5% false negative rate (FNR) in the comparator (a combined 5% misclassification rate).

After 1000 iterations, the following distributions of performance are generated for the diagnostic test in question, as shown in Fig S7.2.

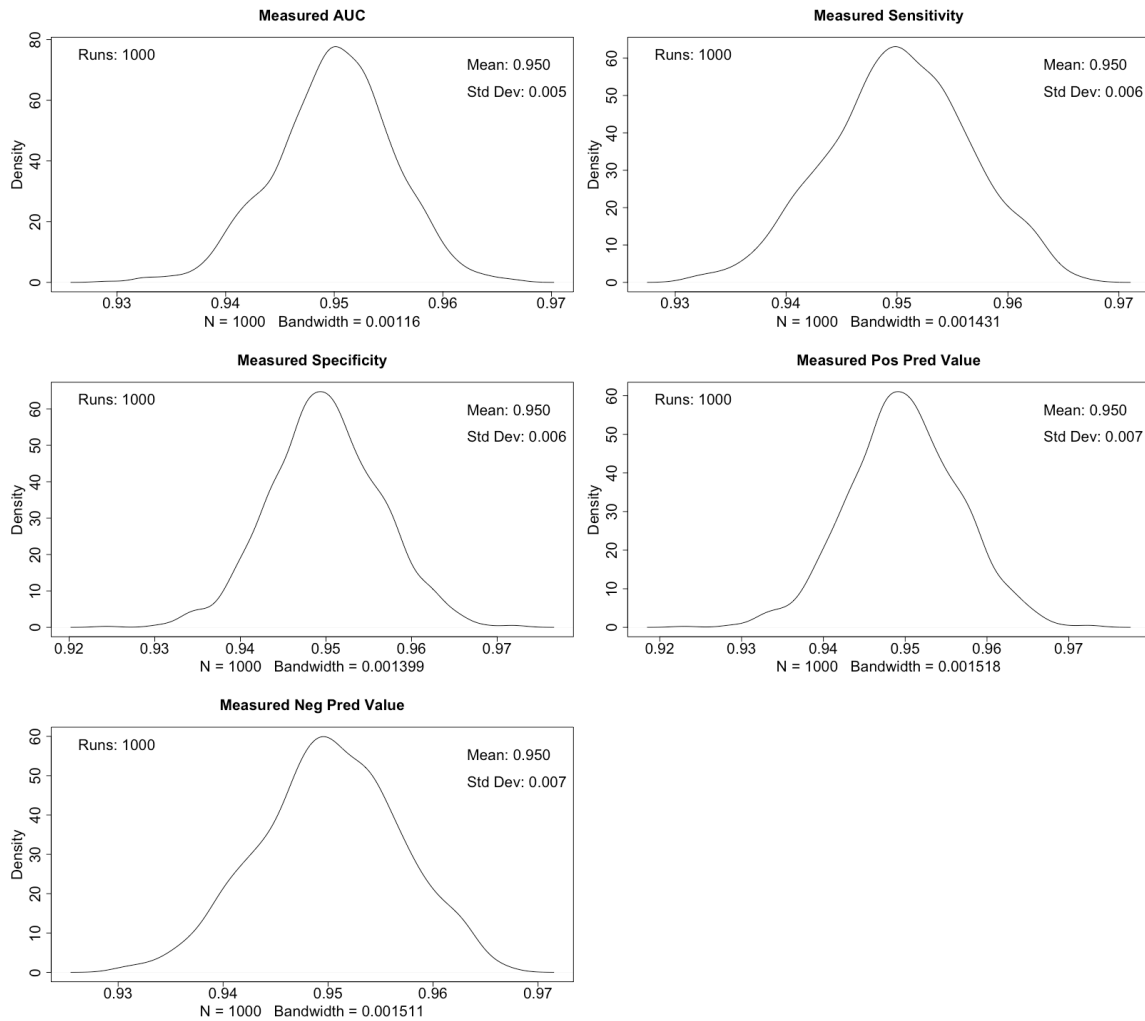

**Fig S7.2** Simulated performance results for a perfect diagnostic test, assuming a 5% misclassification rate by the comparator.

From above, we expect an average NPV of 0.950 with a standard deviation of 0.007. If we require a 99% NPV for this perfect test, then (assuming a 5% error rate in the comparator) we may use the normal probability density function to estimate the probability of this occurring.

**Step 3:** Calculate the probability of measuring a 99% or greater NPV for the perfect test, under the assumption of 5% comparator noise:

$(0.99-0.950)/0.007 = 5.572 =$  number of standard deviations above the mean that 99% cutoff for NPV lies.

The corresponding probability of occurrence is given by the normal probability density function:

$$p(x) = \frac{1}{\sigma\sqrt{2\pi}} e^{-\left(\frac{(x-\mu)^2}{2\sigma^2}\right)}$$

This can be calculated using the following online app:

<https://www.fourmilab.ch/rpkp/experiments/analysis/zCalc.html>

Given  $x = 5.572$ , the chance probability  $p(x)$  is:  $1.26 \times 10^{-8}$ .
